# Supplementary material for: Disruption of OsSEC3A increases the content of salicylic acid and induces plant defense responses in rice
Source: PubMed Central journal article supplement (PMC6018903; doi:10.1093/jxb/erx458), 2017-12-30
Supplement: erx458_suppl_supplementary_figures_and_table.pdf [file erx458_suppl_supplementary_figures_and_table.pdf]

**Disruption of OsSEC3A increases the content of salicylic acid and induces plant defense responses in rice.**

*Jin Ma, Jun Chen, Min Wang, Yulong Ren, Shuai Wang, Cailin Lei, Zhijun Cheng, and Sodmergn Sodmergn*

**SUPPLEMENTARY DATA**

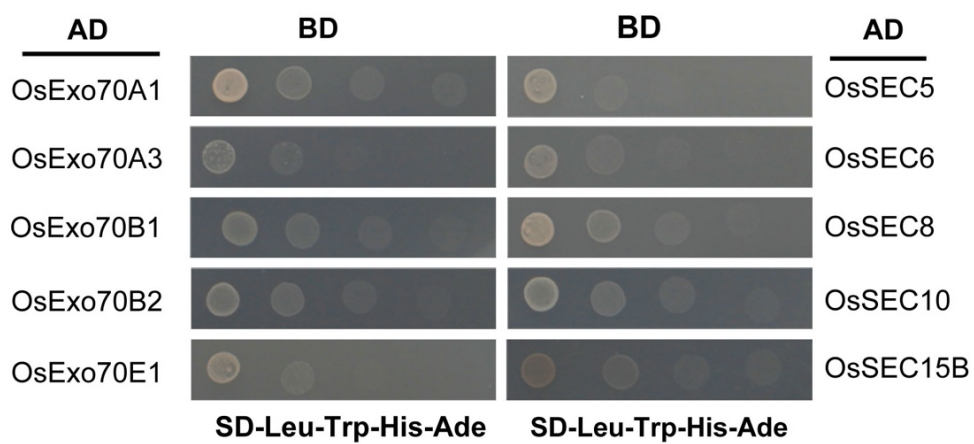

**Supplementary Figure S1.** Several exocyst subunits fused with AD displayed no auto-activation in our experiments.

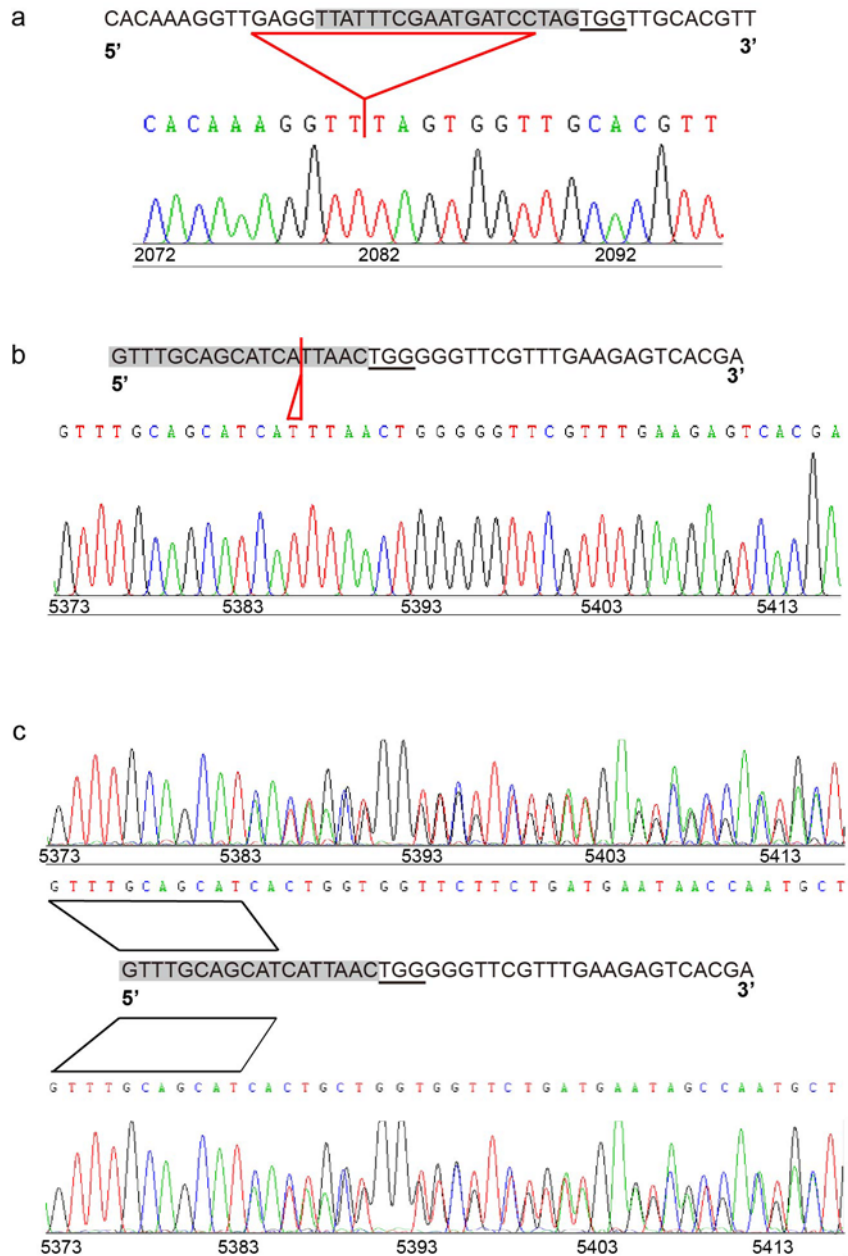

**Supplementary Figure S2.** Alignment of mutations in *OsSEC3A* from chromatograms to the reference genome sequence. (a-b) Insert-cut indels. (c) Overlapping peaks appear after the presumed cleavage site in both directions, indicating sequence heterogeneity at the site.

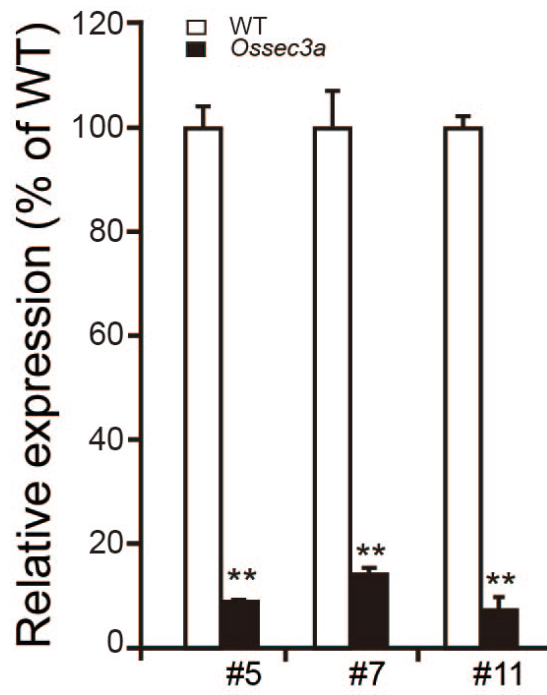

**Supplementary Figure S3.** qRT-PCR analysis of *OsSEC3A* in WT and *Ossec3a* plants (#5, #7, #11).

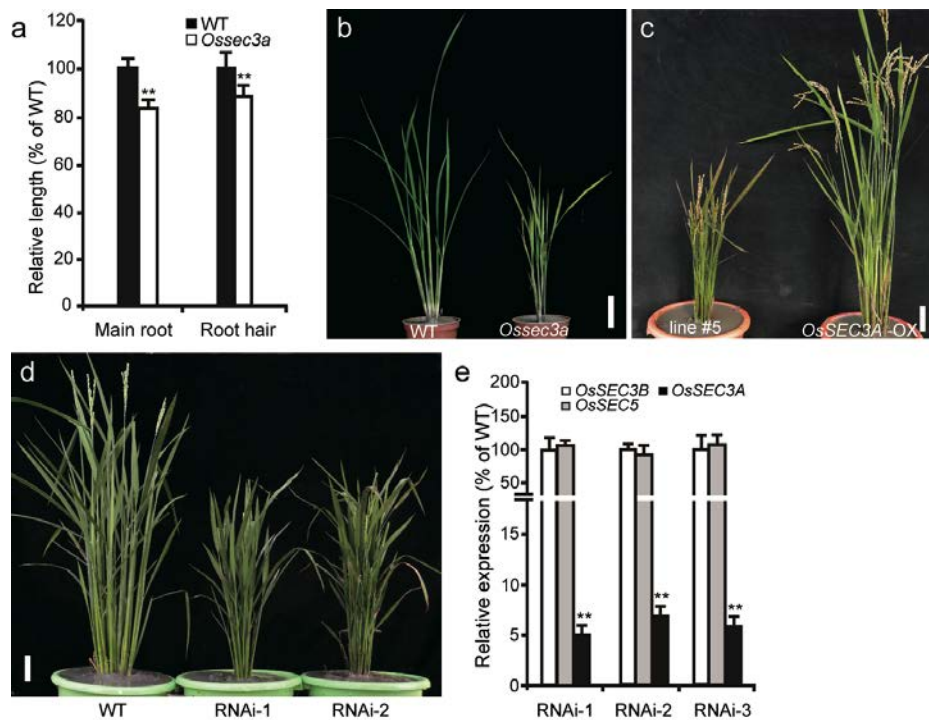

**Supplementary Figure S4.** Performance of whole plants (WT and transgenic lines) at different developmental stages.

(a) Analysis of root and root hair length in WT and *Ossec3a* plants grown in liquid medium under greenhouse conditions. For all experiments, the longest main roots were observed. (b) Phenotypes of WT and *Ossec3a* mutant plants at the tillering stage. (c) The WT full-length cDNA of *OsSEC3A* completely rescued plant stature. (d) *OsSEC3A*-RNAi transgenic lines mimicked the phenotype of *Ossec3a* mutant plants. Scale bars = 10 cm in (b, c, d). (e) qRT-PCR of *OsSEC3A* and other exocyst subunit genes in WT and *OsSEC3A*-RNAi plants. Data are presented as mean  $\pm$  standard error (n = 20). Significant differences were identified with Student's *t*-test (\*\* $p < 0.01$ ).

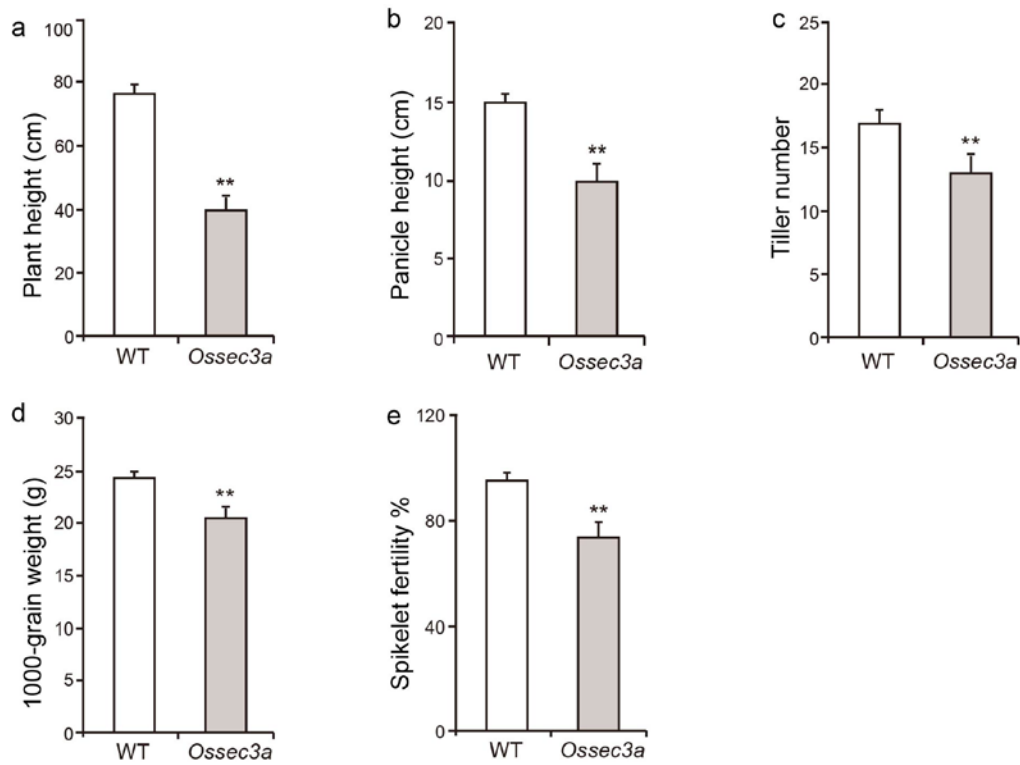

**Supplementary Figure S5.** Agronomic traits (plant height, panicle length, tiller number, thousand-grain weight, and spikelet fertility) of wild-type and *Ossec3a* mutant plants. Data are presented as mean  $\pm$  standard error (n = 20). Significance was determined with Student's *t*-test (\*\* $p < 0.01$ ).

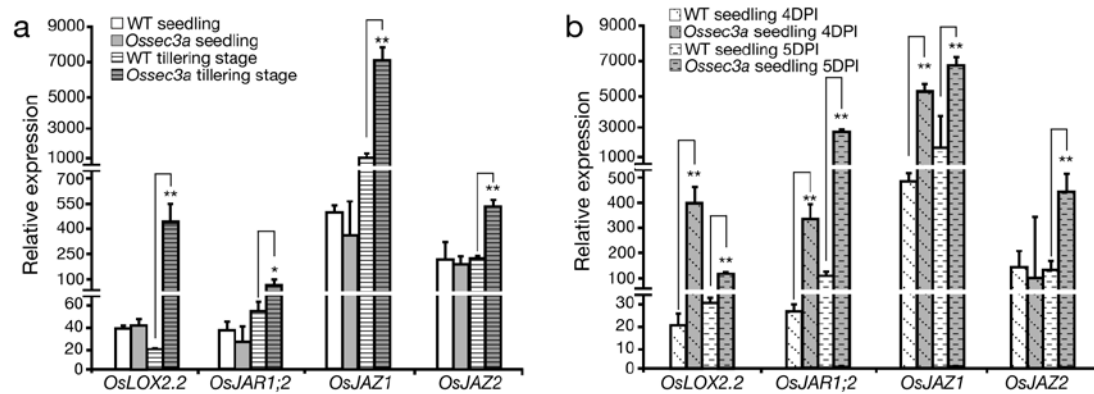

**Supplementary Figure S6.** qRT-PCR of jasmonic acid (JA) synthesis-related genes (*OsLOX2.2*, *OsJAR1;2*) and signaling pathway genes (*OsJAZ1*, *OsJAZ2*) in WT and *Ossec3a* seedling or tillering plants without (a) and with (b) *Magnaporthe oryzae* inoculation. Values are presented as the mean  $\pm$  standard error of three independent experiments. Significant differences were determined with Student's *t*-test (\* $0.01 < p < 0.05$ ; \*\*  $p < 0.01$ ).

```

OsSEC3A .....MARRSSADDAELRACACAAVAAS...GARG 26
Zm XP_008665118.1 .....MARRSSADDAELRACACAAVAAS...GARG 26
Si XP_004982398.1 .....MARRSSADDAELRACACAAVAAS...GARG 26
Sb XP_002464214.1 .....MARRSSADDAELRACACAAVAAS...GARG 26
OsSEC3B LOC_Os11g17600 .....MARRSSADDMELPSSCE...AGILSPEKDR 26
Gm XP_006587232.1 .....MARRSSADGELPSSCE...RAI...FDPR 23
Pt XP_006375042.1 .....MARRSSADDELPSSCE...RAI...EGTK 23
At NP_175186.2 .....MARRSSADDELPSSCE...RAI...EGTK 23
At NP_175187.3 .....MARRSSADDELPSSCE...RAI...EGTK 23
Hs Q9NV70 .....MTAKHAKLQDIF...TFN...DEAL 20
Sc P33332 MRRSSKSPFKRKSRSRETSRHDENTSFFHKRTISGSSAHSRNVSGGAVFSSAPFVSGGNVSHKRVNRSRASNSS...SNELAEQVTE...DRK...RINCCFSRP 97
          z

OsSEC3A E.EVVSFSTRVAKRGRGIFE...KL.GRLAKRFRVLAITVQSSRGEAAKAFRLRVIRYSSGAVLEPAKLYLRLKHLTKRVEVISNDFPSGCTFVLGFDNLRSSQSV 120
Zm XP_008665118.1 E.EVVSFSTRVAKRGRGIFE...KL.GRLAKRFRVLAITVQSSRGEAAKAFRLRVIRYSSGAVLEPAKLYLRLKHLTKRVEVISNDFPSGCTFVLGFDNLRSSQSV 120
Si XP_004982398.1 E.EVVSFSTRVAKRGRGIFE...KL.GRLAKRFRVLAITVQSSRGEAAKAFRLRVIRYSSGAVLEPAKLYLRLKHLTKRVEVISNDFPSGCTFVLGFDNLRSSQSV 120
Sb XP_002464214.1 E.EVVSFSTRVAKRGRGIFE...KL.GRLAKRFRVLAITVQSSRGEAAKAFRLRVIRYSSGAVLEPAKLYLRLKHLTKRVEVISNDFPSGCTFVLGFDNLRSSQSV 120
OsSEC3B LOC_Os11g17600 E.TVVMSTRVAKRGRGVWGHAGKLSRHMARFRVLAITV...KSGQRTKAFRLRVIRYSSGAVLEPAKLYLRLKHLTKRVEVISNDFPSGCTFVLGFDNLRSSQSV 123
Gm XP_006587232.1 Q.KIVMALRVRKSHGIFGKSSKLG.RMMAKFRVLAITV...KSGGLRTSAFLRVIRYSSGAVLEPAKLYLRLKHLTKRVEVISNDFPSGCTFVLGFDNLRSSQSV 119
Pt XP_006375042.1 Q.KIVLSTRVAKRSGVWGHAGKLSRHMARFRVLAITV...KSGQRTKAFRLRVIRYSSGAVLEPAKLYLRLKHLTKRVEVISNDFPSGCTFVLGFDNLRSSQSV 119
At NP_175186.2 Q.SIVMSTRVAKRSGVWGHAGKLSRHMARFRVLAITV...KSGGPRKAFRLRVIRYSSGAVLEPAKLYLRLKHLTKRVEVISNDFPSGCTFVLGFDNLRSSQSV 119
At NP_175187.3 Q.SIVMSTRVAKRSGVWGHAGKLSRHMARFRVLAITV...KSGGPRKAFRLRVIRYSSGAVLEPAKLYLRLKHLTKRVEVISNDFPSGCTFVLGFDNLRSSQSV 119
Hs Q9NV70 L.SIVMSTRVAKRSGVWGHAGKLSRHMARFRVLAITV...KSGGDFYKRIAWALRDLAVVDAKDAIKENFEFLDHEEKIKVWVASTAEKNAFISCIW 116
Sc P33332 DRYWEGFFRNNYITVVRITIEDSKFP.SSRHPRDSEKLENK...KPELLLSKRFNNAELIQIKHARENSDGSFQIGRTWQTELVVVRVDEDEISEGFILTMK 194
          k

OsSEC3A APPQWIMRNIDDRNRLFCILNMCHEILSYLPRVVGIDIVELALWAKRNTLTIENQSSITQDQGER.SVATQTERKVT.VIVENILVUSQAREEEDMEALL 218
Zm XP_008665118.1 APPQWIMRNIDDRNRLFCILNMCHEILSYLPRVVGIDIVELALWAKRNTLTIENQSSITQDQGER.SVATQTERKVT.VIVENILVUSQAREEEDMEALL 218
Si XP_004982398.1 APPQWIMRNIDDRNRLFCILNMCHEILSYLPRVVGIDIVELALWAKRNTLTIENQSSITQDQGER.SVATQTERKVT.VIVENILVUSQAREEEDMEALL 218
Sb XP_002464214.1 APPQWIMRNIDDRNRLFCILNMCHEILSYLPRVVGIDIVELALWAKRNTLTIENQSSITQDQGER.SVATQTERKVT.VIVENILVUSQAREEEDMEALL 218
OsSEC3B LOC_Os11g17600 SFPQWIMRNIDDRNRLFCILNMCHEILSYLPRVVGIDIVELALWAKRNTLTIENQSSITQDQGER.SVATQTERKVT.VIVENILVUSQAREEEDMEALL 217
Gm XP_006587232.1 APPQWIMRNIDDRNRLFCILNMCHEILSYLPRVVGIDIVELALWAKRNTLTIENQSSITQDQGER.SVATQTERKVT.VIVENILVUSQAREEEDMEALL 217
Pt XP_006375042.1 APPQWIMRNIDDRNRLFCILNMCHEILSYLPRVVGIDIVELALWAKRNTLTIENQSSITQDQGER.SVATQTERKVT.VIVENILVUSQAREEEDMEALL 215
At NP_175186.2 APPQWIMRNIDDRNRLFCILNMCHEILSYLPRVVGIDIVELALWAKRNTLTIENQSSITQDQGER.SVATQTERKVT.VIVENILVUSQAREEEDMEALL 214
At NP_175187.3 APPQWIMRNIDDRNRLFCILNMCHEILSYLPRVVGIDIVELALWAKRNTLTIENQSSITQDQGER.SVATQTERKVT.VIVENILVUSQAREEEDMEALL 214
Hs Q9NV70 KLNQRYLHKKI.....DFVNVSSQLLEESV.FSG..ENQSVTGGDEEVDVDEYQELNAR...EEQDEIIMM 175
Sc P33332 KYWNEINSARETVFKSLITLVIQTFFGHVPELVNMDLSLFYEDR...SYQRAVITINRFGSVS.FIK..SFTSNFTTNTIQTSGVSSQFFSAP...TERTIRSET 290

OsSEC3A DTYVMIGEPDAFSERL.KQELVALEARNVYQLLQSEPLIEEVLQGLDASATVDDMDENRIFNKLRLRHMREDIASFESRNNGLEMQSVNNKGMEDHE 317
Zm XP_008665118.1 DTYVMIGEPDAFSERL.KQELVALEARNVYQLLQSEPLIEEVLQGLDASATVDDMDENRIFNKLRLRHMREDIASFESRNNGLEMQSVNNKGMEDHE 317
Si XP_004982398.1 DTYVMIGEPDAFSERL.KQELVALEARNVYQLLQSEPLIEEVLQGLDASATVDDMDENRIFNKLRLRHMREDIASFESRNNGLEMQSVNNKGMEDHE 317
Sb XP_002464214.1 DTYVMIGEPDAFSERL.KQELVALEARNVYQLLQSEPLIEEVLQGLDASATVDDMDENRIFNKLRLRHMREDIASFESRNNGLEMQSVNNKGMEDHE 317
OsSEC3B LOC_Os11g17600 DTYVMIGEPDAFSERL.KQELVALEARNVYQLLQSEPLIEEVLQGLDASATVDDMDENRIFNKLRLRHMREDIASFESRNNGLEMQSVNNKGMEDHE 316
Gm XP_006587232.1 DTYVMIGEPDAFSERL.KQELVALEARNVYQLLQSEPLIEEVLQGLDASATVDDMDENRIFNKLRLRHMREDIASFESRNNGLEMQSVNNKGMEDHE 316
Pt XP_006375042.1 DTYVMIGEPDAFSERL.KQELVALEARNVYQLLQSEPLIEEVLQGLDASATVDDMDENRIFNKLRLRHMREDIASFESRNNGLEMQSVNNKGMEDHE 314
At NP_175186.2 DTYVMIGEPDAFSERL.KQELVALEARNVYQLLQSEPLIEEVLQGLDASATVDDMDENRIFNKLRLRHMREDIASFESRNNGLEMQSVNNKGMEDHE 313
At NP_175187.3 DTYVMIGEPDAFSERL.KQELVALEARNVYQLLQSEPLIEEVLQGLDASATVDDMDENRIFNKLRLRHMREDIASFESRNNGLEMQSVNNKGMEDHE 313
Hs Q9NV70 EGCYYAISNPEAFSERL.SRELQVLDGMNIGSMASEKQVNLKMLKLDLPELKEVDQIELP...SSYEMEQSVKQMDCHSESNIHIEGNVNVVPLSEHE 274
Sc P33332 ESNVFPVSTH...SVEYHAGM...SLNKA...FYSS...STLNEVNRKRYELECCQCCEP...ELRLLEEQK...QRENEKML...EERF...KRR...RQM...LEH...CR...EER 390
          a          n          a          i          e          i          e

```

### Supplementary Figure S7. Evolutionary analysis of OsSEC3A.

Sequence alignment of OsSEC3A with the equivalent regions of its homologs in different species. Conserved arginine/lysine residues predicted to be important for phosphoinositide binding are highlighted in red. Identical amino acids and similar amino acids are shaded in black (100%), grey (>75%), green (50%), or yellow (33%). The following abbreviations were used: Zm, *Zea mays*; Si, *Setaria italic*; Sb, *Sorghum bicolor*; Os, *Oryza sativa*; Gm, *Glycine max*; Pt, *Populus trichocarpa*; At, *Arabidopsis thaliana*; Hs, *Homo sapiens*; Sc, *Saccharomyces cerevisiae*.



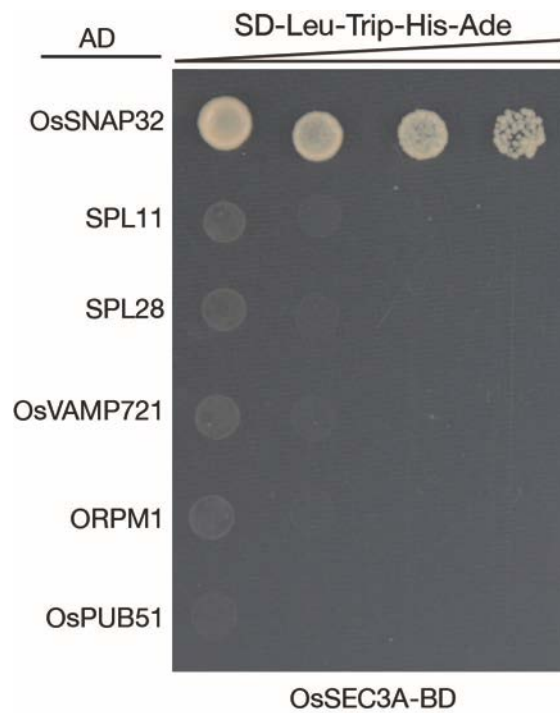

**Supplementary Figure S8.** Interaction of OsSEC3A with a group of known immunity-and defense-related protein factors. Y2H assay in *S. cerevisiae*. Full-length OsSEC3A was ligated into pGBKT7 to generate the OsSEC3A-BD plasmid. Several exocyst constructs were fused with AD.



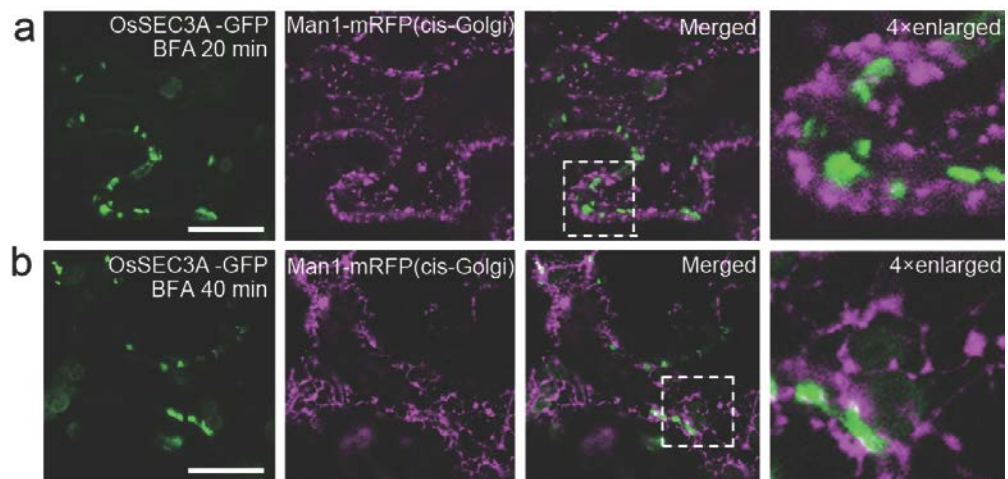

**Supplementary Figure S9.** BFA treatment of leaf epidermal cells coexpressing OsSEC3A-GFP and Man1-mRF. Scale bars = 10  $\mu$ m.

**Supplementary Table S1. Sequences of DNA oligonucleotides used in this study.**

| <b>Primer Name</b>                            | <b>Sequence</b>                            |
|-----------------------------------------------|--------------------------------------------|
| OsSEC3A-Pro-F                                 | CCATGATTACGAATTCCAAGTTTTAGGCA<br>TGGTGTCA  |
| OsSEC3A-Pro-R                                 | CTCAGATCTACCATGGTTGGGGAAGAGG<br>GATGAGTT   |
| OsSEC3A-MBP-F                                 | CGACGGATCCGAATTCATGGCGAAGTCG<br>AGCGCG     |
| OsSEC3A-MBP-R                                 | TACCTGCAGGGAATTCCTAGAAGTTAGC<br>AAGGACATC  |
| OsSEC3A <sup>N</sup> (a.a. 1–450)<br>-MBP-F   | CGACGGATCCGAATTCATGGCGAAGTCG<br>AGCGCG     |
| OsSEC3A <sup>N</sup> (a.a. 1–450)<br>-MBP-R   | TACCTGCAGGGAATTCCTAACAGCTCTTG<br>TCCAGACTC |
| OsSEC3A <sup>C</sup> (a.a. 310–888)<br>-MBP-F | CGACGGATCCGAATTCAAAGGACTCGTT<br>GAAGAACT   |
| OsSEC3A <sup>C</sup> (a.a.310–888)<br>-MBP-R  | TACCTGCAGGGAATTCCTAGAAGTTAGC<br>AAGGACAT   |
| qOsCATA-F                                     | CAACCGCAACGTCGACAACCTTCTT                  |
| qOsCATA-R                                     | TTCACCGGCAGCATCAGGTAGTTT                   |
| qOsGSTF10-F                                   | GCTTCTGTGCTCGAAGCCTA                       |
| qOsGSTF10-R                                   | AGCAGACGGCATCTTCAGAG                       |
| qOsGSTU6-F                                    | TACATCGACGAGGTGTTCCC                       |
| qOsGSTU6-R                                    | TGCCTCTGAACACCGGAATC                       |
| qOsAOX1a-F                                    | CTTCGCATCGGACATCCATTA                      |
| qOsAOX1a-R                                    | TCCTCGGCAGTAGACAAACATC                     |
| qOsAOX1b-F                                    | CCTGCTCAGTTCATCACCATCA                     |
| qOsAOX1b-R                                    | GCATAAAACGGAGTGACAATAGC                    |
| qPO-C1-F                                      | TAGAGGCCGTGTGCAATCAG                       |
| qPO-C1-R                                      | GCTTGCACCTGTAGAGTCCC                       |
| qEDS1-F                                       | CATTCCAAGAACGAGGACACTG                     |
| qEDS1-r                                       | CAAGACTCAAGGCTAGAACCGA                     |
| qPAD4-F                                       | AGGGGTTCTTGAGGCTGTGC                       |

|                   |                                        |
|-------------------|----------------------------------------|
| qPAD4-R           | GCTGAGCTTGACGATGATGTG                  |
| qPAL-F            | GCACATCTTGAGGGAAGCT                    |
| qPAL-R            | GCGCGGATAACCTCAATTTG                   |
| qPR1a-F           | AGGGCGACTGCAAGCTGGTC                   |
| qPR1a-R           | ACCACTGCTTCTCCGACACCC                  |
| qNPR1-F           | GCTGGTGCTCGACTACCTCTACA                |
| qNPR1-R           | CAAGGACATCAAGGAGACGC                   |
| qPBZ1-F           | TGATGGCTCCGGCCTGCGTC                   |
| qPBZ1-R           | GGTCTTGTATGTGCTTCCCAC                  |
| OsLOX2.2-F        | CCATCAGTGGACCGACATCA                   |
| OsLOX2.2-R        | GAGTGGCCGGGTCATTGTCG                   |
| OsJAR1;2-F        | GGATTGTTGATGGCGATACCT                  |
| OsJAR1;2-R        | TGCCACCTTTCGTTATGACTTG                 |
| OsJAZ1-F          | CTGGGACGCTGAAAGACACG                   |
| OsJAZ1-R          | AACCTCTGCAGCGACACCTT                   |
| OsJAZ2-F          | CCCCGCTGACCATCTTCTACGA                 |
| OsJAZ2-R          | GCCTTCTTGTATGGTTCGCTCGT                |
| qOsSEC3A-F        | TGTCCCAAGCAAAGGATGAA                   |
| qOsSEC3A-R        | AAATGCGTAACCACTCATCC                   |
| qOsSEC3B-F        | TGTGGAGATGGCTATGTGGG                   |
| qOsSEC3B-R        | GTCTTTCTGAATGGCAACTT                   |
| qOsSEC5F-F        | CGTGGGAACATTAGAAAAGG                   |
| qOsSEC5R-R        | CCTCCATTGACTTGTAAGC                    |
| OsSEC3A-GFP-F     | GCCCAGATCAACTAGTATGGCGAAGTCG<br>AGCGC  |
| OsSEC3A-GFP-R     | TGCTCACCATGGATCCGAAGTTAGCAAG<br>GACATC |
| 1305OsSEC3A-GFP-F | CGGAGCTAGCTCTAGAATGGCGAAGTCG<br>AGCGC  |

|                                             |                                                        |
|---------------------------------------------|--------------------------------------------------------|
| 1305OsSEC3A-GFP-R                           | TCGAGACGTCTCTAGAGAAGTTAGCAAG<br>GACATC                 |
| OsSEC3A-Crispr-1F                           | AGATGATCCGTGGCATTATTTTCGAATGATC<br>CTAGGTTTTAGAGCTATGC |
| OsSEC3A-Crispr-1R                           | GCATAGCTCTAAAACCTAGGATCATTCGA<br>AATATGCCACGGATCATCT   |
| OsSEC3A-Crispr-2F                           | AGATGATCCGTGGCAGTTTGCAGCATCAT<br>TAACGTTTTAGAGCTATGC   |
| OsSEC3A-Crispr-2R                           | GCATAGCTCTAAAACGTTAATGATGCTGC<br>AAACTGCCACGGATCATCT   |
| 1390OsSEC3A-CDS-F                           | TCTGCACTAGGTACCTGCAGATGGCGAA<br>GTCGAGCGC              |
| 1390OsSEC3A-CDS-R                           | GGGGATCCGTGACCTGCAGCTAGAAGT<br>TAGCAAGGACATC           |
| OsSEC3A-RNAi1-F                             | TTACTTCTGCACTAGGTACCTGGGCATAG<br>GTGAAGCAGAT           |
| OsSEC3A-RNAi1-R                             | TAGAGCTCAGGCCTGGTACCCGCAAGCG<br>ATCAAGCAACTT           |
| OsSEC3A-RNAi2-F                             | GAATTCCCGGGGATCCTGGGCATAGGTG<br>AAGCAGAT               |
| OsSEC3A-RNAi2-R                             | CGTAGTCGACGGATCCCGCAAGCGATCA<br>AGCAACTT               |
| OsSEC3A-BD-F                                | GAATTCCCGGGGATCCGTATGGCGAAGT<br>CGAGCGC                |
| OsSEC3A-BD-R                                | GCAGGTCGACGGATCCCTAGAAGTTAGC<br>AAGGACATC              |
| OsSEC3A<br>(a.a. 1–160)-BD-F                | GAATTCCCGGGGATCCGTATGGCGAAGT<br>CGAGCGCG               |
| OsSEC3A<br>(a.a. 1–160)-BD-R                | GCAGGTCGACGGATCCCTACACAAAATC<br>AATTCAA                |
| OsSEC3A<br>(a.a. 190–510)-BD-F              | GAATTCCCGGGGATCCGTCAAAGTGA<br>GGAAAGTAAC               |
| OsSEC3A<br>(a.a. 190–510)-BD-R              | GCAGGTCGACGGATCCCTAAGATACTGT<br>TGAAGTGTCAGC           |
| OsSEC3A <sub>c</sub><br>(a.a. 521–888)-BD-F | GAATTCCCGGGGATCCGTATCCCACTTCT<br>TGTGGATGA             |
| OsSEC3A <sub>c</sub><br>(a.a. 521–888)-BD-R | GCAGGTCGACGGATCCCTAGAAGTTAGC<br>AAGGACATCT             |
| OsSNAP32-AD-F                               | GGAGGCCAGTGAATTCATGAGCGGGAGG                           |

|                |                                              |
|----------------|----------------------------------------------|
|                | AGATCGTT                                     |
| OsSNAP32-AD-R  | CACCCGGGTGGAATTCTTATTTCCAAGC<br>AGACGGCG     |
| OsPUB51-AD-F   | GGAGGCCAGTGAATTCATGGAGATCGAG<br>GAGGCGGG     |
| OsPUB51-AD-R   | CACCCGGGTGGAATTCCTAACTCTTTGTT<br>CTCCAGTC    |
| OsRPM1-AD-F    | GGAGGCCAGTGAATTCATGCATACTGAG<br>GTAGGGATCA   |
| OsRPM1-AD-R    | CACCCGGGTGGAATTCTCATATGGCGGC<br>CGTTCTTT     |
| SPL11-AD-F     | GGAGGCCAGTGAATTCATGGCCGGCGAC<br>CGAG         |
| SPL11-AD-R     | CACCCGGGTGGAATTCTCATAACAACATA<br>GGGTATTGAG  |
| SPL28-AD-F     | GGAGGCCAGTGAATTCATGGCGGGCG<br>CGGTGTCGGC GCT |
| SPL28-AD-R     | CACCCGGGTGGAATTCTCATATAAGTCTC<br>AGTTCGTAT   |
| OsVAMP721-AD-F | CATCGATACGGGATCCATATGGGGCAGC<br>AGTCGCTGAT   |
| OsVAMP721-AD-R | CGAGCTCGATGGATCCTCACTTGCACTT<br>GAAGCCAT     |
| OsExo70A1-AD-F | CATCGATACGGGATCCATATGGAGACCCT<br>TGCGCAGC    |
| OsExo70A1-AD-R | CGAGCTCGATGGATCCTCAAGTACGCTC<br>TTGTTTTT     |
| OsExo70A3-AD-F | CATCGATACGGGATCCATATGGTGGTGGC<br>GGCGGCGGC   |
| OsExo70A3-AD-R | CGAGCTCGATGGATCCTCAGCGCTTCTG<br>CTCCCCCAT    |
| OsExo70B1-AD-F | CATCGATACGGGATCCATATGGCGGAGG<br>ACGGCGAGGAGA |
| OsExo70B1-AD-R | CGAGCTCGATGGATCCTCACTTGGACAC<br>TCCTTCAAAC   |
| OsExo70B2-AD-F | CATCGATACGGGATCCATATGGCTGGCAT<br>GGAGGATACT  |
| OsExo70B2-AD-R | CGAGCTCGATGGATCCTTAGCCTGGGTG<br>GGAGGCAGT    |
| OsExo70E1-AD-F | CATCGATACGGGATCCATATGATGGCTGC<br>TGAGTTAATT  |
| OsExo70E1-AD-R | CGAGCTCGATGGATCCCTACAATGTTTTT<br>TGAGCTCCT   |

|                  |                                              |
|------------------|----------------------------------------------|
| OsSEC5-AD-F      | CATCGATACGGGATCCATATGGCGAGCG<br>ACAGCGACGT   |
| OsSEC5-AD-R      | CGAGCTCGATGGATCCTCATCGACGCCG<br>CCTCGAG      |
| OsSEC6-AD-F      | CATCGATACGGGATCCATATGGAGGATCT<br>GGGCATCGA   |
| OsSEC6-AD-R      | CGAGCTCGATGGATCCTTACTGTCCAAG<br>CTTGCTCCAT   |
| OsSEC8-AD-F      | GGAGGCCAGTGAATTCATGAGCCGCACC<br>GGCGGCCG     |
| OsSEC8-AD-R      | CACCCGGGTGGAATTCTTAATGGCCAA<br>AATCTGAGAG    |
| OsSEC10-AD-F     | CATCGATACGGGATCCATATGGAGTTCAA<br>CAGCACACCA  |
| OsSEC10-AD-R     | CGAGCTCGATGGATCCCTATTCAGCCATG<br>ATACTGTTT   |
| OsSEC15bN-AD-F   | CATCGATACGGGATCCATATGACTGCTCA<br>GACCAAGAAGA |
| OsSEC15bN-AD-R   | CGAGCTCGATGGATCCTCACTTTTTTAGA<br>AGCTTTAGAG  |
| OsSNAP32-GST-F   | TGGATCCCCGGAATTCATGAGCGGGAGG<br>AGATCGTT     |
| OsSNAP32-GST-R   | GTCGACCCGGGAATTCTTATTTCCAAGC<br>AGACGGCG     |
| OsExo70A1-GST-F  | TGGATCCCCGGAATTCATGGAGACCCTT<br>GCGCAGC      |
| OsExo70A1-GST-R  | GTCGACCCGGGAATTCTCAAGTACGCTC<br>TTGTTTC      |
| OsExo70B1-GST-F  | TGGATCCCCGGAATTCATGGCGGAGGAC<br>GGCGAGGAGA   |
| OsExo70B1-GST-R  | GTCGACCCGGGAATTCTCACTTGGCACT<br>CCTTCAAAC    |
| NLuc-OsSEC3A_c-F | CGGGGGACGAGCTCGGTACCATCCCCT<br>TCTTGTGGATGA  |
| NLuc-OsSEC3A_c-R | ACGAGATCTGGTCGACGAAGTTAGCAAG<br>GACATCT      |
| CLuc-OsSNAP32-F  | ACGCGTCCCGGGGCGGTACCATGAGCGG<br>GAGGAGATCGTT |
| CLuc-OsSNAP32-R  | AGCTCTGCAGGTCGACTTATTTCCAAGC<br>AGACGGCG     |
| CLuc-OsSEC5-F    | ACGCGTCCCGGGGCGGTACCATGGCGAG<br>CGACAGCGACGT |
| CLuc-OsSEC5-R    | AGCTCTGCAGGTCGACTCATCGACGCCG<br>CCTCGAG      |

|                  |                                                |
|------------------|------------------------------------------------|
| CLuc-OsSEC6-F    | ACGCGTCCCGGGGCGGTACCATGGAGGA<br>TCTGGGCATCGA   |
| CLuc-OsSEC6-R    | AGCTCTGCAGGTCGACTTACTGTCCAAG<br>CTTGCTCCAT     |
| CLuc-OsSEC15bN-F | ACGCGTCCCGGGGCGGTACCATGACTGC<br>TCAGACCAAGAAGA |
| CLuc-OsSEC15bN-R | AGCTCTGCAGGTCGACTCACTTTTTTAG<br>AAGCTTTAGAG    |
